# Supplementary material for: Metabolite Profiling of Microwave-Assisted Sargassum fusiforme Extracts with Improved Antioxidant Activity Using Hybrid Response Surface Methodology and Artificial Neural Networking-Genetic Algorithm
Source: MDPI journal article supplement (doi:10.3390/antiox11112246), 2022-11-14
Supplement: s1 [file s1]

**Supplementary materials:**

**Table S1:** Independent process variables with experimental ranges and levels for MAE of SF

| Variables                   | Factors | Level      |     |     |     |            |
|-----------------------------|---------|------------|-----|-----|-----|------------|
|                             | $X_i$   | $\alpha-1$ | -1  | 0   | 1   | $\alpha+1$ |
| Ethanol concentration (%)   | $X_1$   | 0          | 30  | 50  | 70  | 90         |
| Extraction time (min)       | $X_2$   | 1          | 2   | 3   | 4   | 5          |
| Extraction temperature (°C) | $X_3$   | 90         | 110 | 130 | 140 | 150        |
| Equipment power             | $X_4$   | 150        | 300 | 450 | 600 | 750        |

**Table S2:** Comparison between optimized model and experimental values

| Dependent variables | Experimental value | ANN-GA |
|---------------------|--------------------|--------|
| DPPH (% inhibition) | 29.23±0.41         | 28.017 |
| ABTS (% inhibition) | 35.49±0.19         | 36.075 |
| TPC (mgGAE/g)       | 43.03±0.24         | 43.658 |
| TFC (mgCAE/g)       | 17.30±0.08         | 17.679 |

**Figure S1.** The three-dimensional (3D) response surface plots of MAE-SF extraction condition displaying the influence of independent parameters (Ethanol Concentration, Time, Temperature, and Intensity) on dependent variables (DPPH radical-scavenging activity, ABTS, TPC, and TFC) as a function of significant interaction factors for RSM.

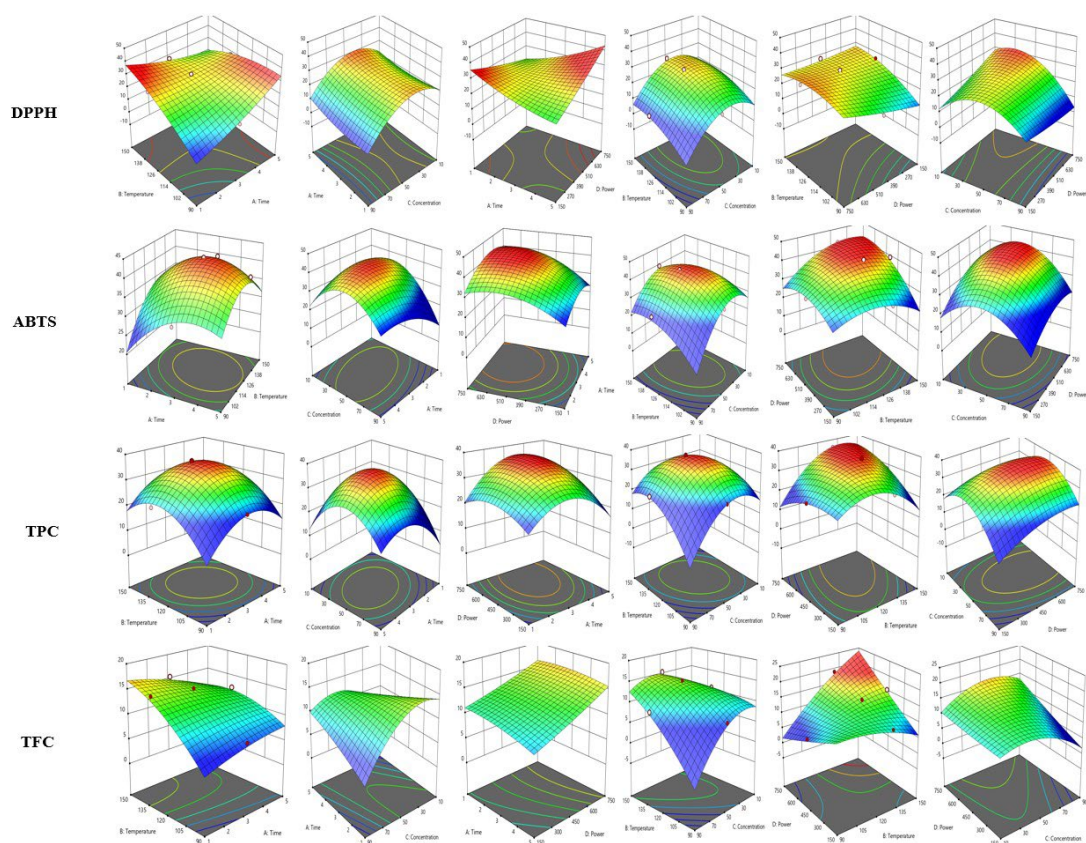

**Figure S2:** Regression of experimental and predicted values in ANN model of MAE for SF using the training, testing and validation datasets to optimized the extraction conditions.

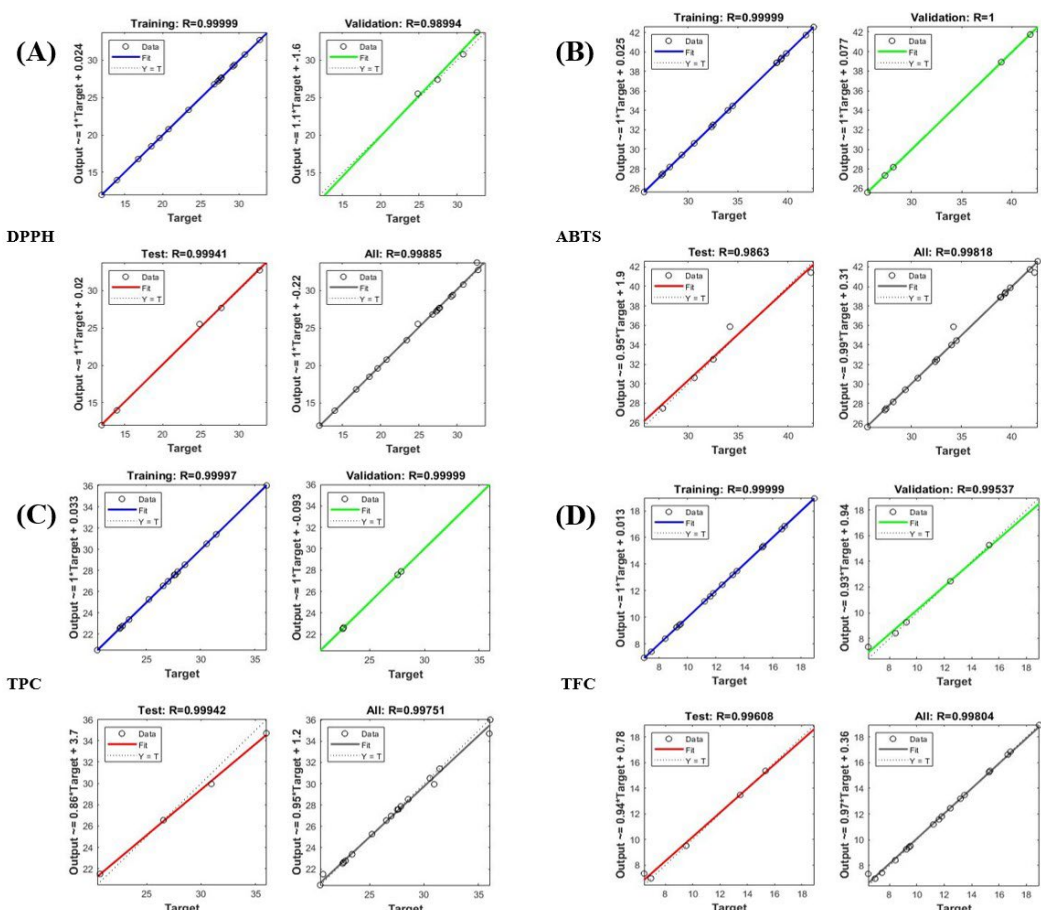

Table S3. Setting parameters of genetic algorithm used in the optimization of process for SF

| Setting parameters             | Values               |
|--------------------------------|----------------------|
| Population size                | 90                   |
| Scaling function               | Rank                 |
| Selection function             | Stochastic uniform   |
| Elite count                    | default              |
| Crossover function             | Constraint dependent |
| Mutation function              | Constraint dependent |
| Plot function                  | Best fitness         |
| Nonlinear constraint algorithm | Augmented Lagrangian |
